# Supplementary material
Source: publisher figshare collection journal article supplement (https://springernature.figshare.com/ndownloader/files/17644190)
Supplement: Supplementary file 1 [file 17644190]

Additional file 3: Summary of findings for ARB versus ACEI (SR1.2.) in PD patients

| **Summary of findings:** | | | | | | |
| --- | --- | --- | --- | --- | --- | --- |
| **ARB compared to ACEI for peritoneal dialysis patients (SR1.2.)** | | | | | | |
| **Patient or population**: peritoneal dialysis patients  **Setting**:  **Intervention**: ARB  **Comparison**: ACEI | | | | | | |
| Outcomes | **Anticipated absolute effects*** (95% CI) | | Relative effect (95% CI) | № of participants  (studies) | Certainty of the evidence (GRADE) | Comments |
| **Risk with ACEI** | **Risk with ARB** |
| GFR | The mean GFR was **0** | The mean GFR in the intervention group was 0.18 higher (0.04 lower to 0.4 higher) | - | 60 (1 RCT) | ⨁⨁◯◯ LOW a,b,c | There might be no difference between ARB and ACEI on the preservation of GFR in PD patients. |
| Urine volume | The mean urine volume was **0** | The mean urine volume in the intervention group was 145 higher (8.35 lower to 298.35 higher) | - | 60 (1 RCT) | ⨁⨁◯◯ LOW a,b | There might be no difference between ARB and ACEI on the preservation of urine volume in PD patients. |
| Anuria rate | 367 per 1,000 | **400 per 1,000** (209 to 759) | **RR 1.09** (0.57 to 2.07) | 60 (1 RCT) | ⨁⨁◯◯ LOW a,b,c | There might be no difference between ARB and ACEI on the risk of anuria in PD patients. |
| Tortal mortality | 0 per 1,000 | **0 per 1,000** (0 to 0) | not estimable | 60 (1 RCT) | ⨁⨁◯◯ LOW a,b |  |
| Technical survival | 0 per 1,000 | **0 per 1,000** (0 to 0) | not estimable | 60 (1 RCT) | ⨁⨁◯◯ LOW a,b |  |
| Cardiovascular event | 100 per 1,000 | **0 per 1,000** (0 to 0) | not estimable | 60 (1 RCT) | ⨁⨁◯◯ LOW a,b |  |
| Hyperkalemia | 69 per 1,000 | **84 per 1,000** (25 to 247) | **OR 1.23** (0.35 to 4.40) | 144 (2 RCTs) | ⨁⨁◯◯ LOW a,c | There might be no difference between ARB and ACEI on the risk of hyperkalemia in PD patients. |
| ***The risk in the intervention group** (and its 95% confidence interval) is based on the assumed risk in the comparison group and the relative effect of the intervention (and its 95% CI).  **ARB**, angiotensin receptor blocker; **ACEI**, angiotensin-converting enzyme inhibitor; **PD**, peritoneal dialysis; **GFR**, glomerular filtration rate **CI:** Confidence interval; **MD:** Mean difference; **RR:** Risk ratio; **OR:** Odds ratio | | | | | | |
| **GRADE Working Group grades of evidence** **High certainty:** We are very confident that the true effect lies close to that of the estimate of the effect **Moderate certainty:** We are moderately confident in the effect estimate: The true effect is likely to be close to the estimate of the effect, but there is a possibility that it is substantially different **Low certainty:** Our confidence in the effect estimate is limited: The true effect may be substantially different from the estimate of the effect **Very low certainty:** We have very little confidence in the effect estimate: The true effect is likely to be substantially different from the estimate of effect | | | | | | |

#### Explanations

a. Many unclear criteria in the risk of bias table.

b. Only one study for the comparison. A limited number of patients.

c. The 95% CI does not reach the clinical decision threshold.
